# Supplementary material
Source: PubMed Central journal article supplement (PMC3961670)
Supplement: supp_M114.548586_jbc.M114.548586-1.pdf [file supp_M114.548586_jbc.M114.548586-1.pdf]

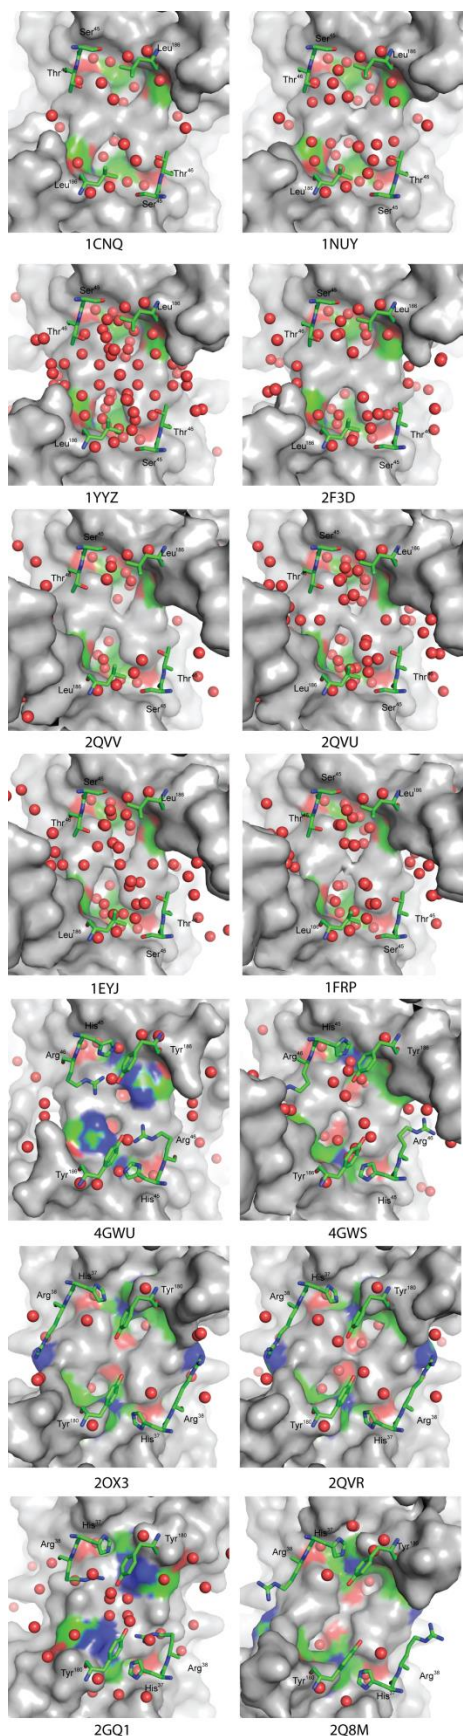

**Supplemental Figure 1. Hydration levels of the central regions of *p*FBPase and *e*FBPase.** Central cavities from PDB ID 1CNQ (R-state *p*FBPase, product complex, 2.3 Å), PDB ID 1NUY (R-state *p*FBPase, product complex, 1.3 Å), PDB ID 1YYZ (I<sub>R</sub>-state Leu<sup>54</sup> *p*FBPase, AMP complex, 1.9 Å), PDB ID 2F3D (I<sub>T</sub>-state Asp<sup>10</sup> *p*FBPase, AMP complex, 1.8 Å), PDB ID 2QVV (*p*FBPase, Fru-2,6-P<sub>2</sub> complex, 2 Å), PDB ID 2QVU (*p*FBPase, Fru-2,6-P<sub>2</sub> complex, 1.5 Å), PDB ID 1EYJ (T-state *p*FBPase, AMP complex, 2.3 Å), PDB ID 1FRP (T-state *p*FBPase, AMP complex, 2.0 Å), PDB ID 4GWU (Cav<sup>-</sup> *p*FBPase, Fru-2,6-P<sub>2</sub> complex, 3.0 Å), PDB ID 4GWS (T-state Cav<sup>-</sup> *p*FBPase, AMP complex, 2.8 Å), PDB ID 2OX3 (R-state *e*FBPase, product complex, 2.2 Å), PDB ID 2QVR (*e*FBPase, Fru-2,6-P<sub>2</sub> complex, 2.2 Å), PDB ID 2GQ1 (*e*FBPase, ammonium sulfate complex, 1.5 Å), and PDB ID 2Q8M (*e*FBPase, AMP-Glc-6-P complex, 2.1 Å) are displayed. The surface renderings are of subunits C1 and C4 of the tetramer, with ball-and-stick models representing selected residues from subunits C2 and C3 and water molecules as red spheres. The top 8 images are of *p*FBPase at various resolutions and conformational states, whereas the subsequent pair of images are of Cav<sup>-</sup> *p*FBPase and the last four are of complexes of *e*FBPase, again at various resolutions and conformational states.
